# Supplementary material for: Learning high-accuracy error decoding for quantum processors
Source: Springer Nature journal article supplement (doi:10.1038/s41586-024-08148-8), 2024-11-20
Supplement: 41586_2024_8148_MOESM1_ESM.pdf [file 41586_2024_8148_MOESM1_ESM.pdf]

**Supplementary information**

---

**Learning high-accuracy error decoding for quantum processors**

---

In the format provided by the authors and unedited

# Supplementary information

## Pseudocode

---

**Algorithm 1: AttentionWithBias**

---

/\* Computes a single self-attention head. \*/  
**Input:**  $X \in \mathbb{R}^{d_d \ell}$ , vector representations of primary sequence.  $B' \in \mathbb{R}^{\ell \times \ell}$  attention bias.  
**Output:**  $\tilde{V} \in \mathbb{R}^{d_{\text{mid}} \ell}$ , updated representations of tokens in  $X$ .  
**Parameters:**  $\mathcal{W}_{qkv}$  consisting of:  $W_q \in \mathbb{R}^{d_{\text{attn}} d_d}$ ,  $b_q \in \mathbb{R}^{d_{\text{attn}}}$   $W_k \in \mathbb{R}^{d_{\text{attn}} d_d}$ ,  $b_k \in \mathbb{R}^{d_{\text{attn}}}$   
 $W_v \in \mathbb{R}^{d_{\text{mid}} d_d}$ ,  $b_v \in \mathbb{R}^{d_d}$ .

- 1  $Q \leftarrow W_q X + b_q \mathbf{1}^\top$     [[Query  $\in \mathbb{R}^{d_{\text{attn}} \ell}$ ]]
- 2  $K \leftarrow W_k X + b_k \mathbf{1}^\top$     [[Key  $\in \mathbb{R}^{d_{\text{attn}} \ell}$ ]]
- 3  $V \leftarrow W_v X + b_v \mathbf{1}^\top$     [[Value  $\in \mathbb{R}^{d_{\text{mid}} \ell}$ ]]
- 4  $S \leftarrow K^\top Q + B'$     [[Score  $\in \mathbb{R}^{\ell \ell}$ ]]
- 5 **return**  $\tilde{V} = V \cdot \text{softmax}(S / \sqrt{d_{\text{attn}}})$

---

---

**Algorithm 2: MHAttentionWithBias**

---

/\* Computes Multi-Head self-attention layer with attention bias. \*/  
**Input:**  $X \in \mathbb{R}^{d_d \times \ell}$ , vector representations sequence.  $B \in \mathbb{R}^{d_b \ell \ell}$  embedded attention bias.  
**Output:**  $\tilde{V} \in \mathbb{R}^{d_d \ell}$ , updated representations of tokens in  $X$ .  
**Hyperparameters:**  $H$ , number of attention heads  
**Parameters:**  $\mathcal{W}$  consisting of  
For  $h = 0, 1 \dots H - 1$ ,  $\mathcal{W}_{qkv}^h$  consisting of:  
|  $W_q^h \in \mathbb{R}^{d_{\text{attn}} d_d}$ ,  $b_q^h \in \mathbb{R}^{d_{\text{attn}}}$ ,  
|  $W_k^h \in \mathbb{R}^{d_{\text{attn}} d_d}$ ,  $b_k^h \in \mathbb{R}^{d_{\text{attn}}}$ ,  
|  $W_v^h \in \mathbb{R}^{d_{\text{mid}} d_d}$ ,  $b_v^h \in \mathbb{R}^{d_{\text{mid}}}$ .  
 $W_b \in \mathbb{R}^{h \times d_b}$   
 $W_o \in \mathbb{R}^{d_d d_{\text{mid}}}$ ,  $b_o \in \mathbb{R}^{d_{\text{out}}}$ .

- 1  $B' \leftarrow W_b B$
- 2 **for**  $h = 0, 1 \dots H - 1$  **do**
- 3 |  $Y^h \leftarrow \text{AttentionWithBias}(X, B'[h, :, :]) | \mathcal{W}_{qkv}^h$
- 4 **end**
- 5  $Y \leftarrow [Y^0; Y^1; \dots; Y^{H-1}]$
- 6 **return**  $\tilde{V} = W_o Y + b_o \mathbf{1}^\top$

---

---

**Algorithm 3: GatedDenseBlock**

---

**Input:**  $X \in \mathbb{R}^{d_d \times \ell}$ , input  
**Output:**  $Y \in \mathbb{R}^{d_d \times \ell}$ , output  
**Parameters:**  $W_1 \in \mathbb{R}^{w d_d \times d_d}$ ,  $W_2 \in \mathbb{R}^{d_d \times (w d_d / 2)}$ ,  $\mathbf{b}_1 \in \mathbb{R}^{w d_d}$ ,  $\mathbf{b}_2 \in \mathbb{R}^{d_d}$   
**Hyperparameters:**  $w$ , widening factor

```
1 for  $l = 0, 1, \dots, \ell - 1$  do
2    $Y \leftarrow W_1 X[:, l] + \mathbf{b}_1 \mathbf{1}^\top$ 
3    $Y \leftarrow \text{GELU}(Y[:, (w d_d / 2)]) Y[(w d_d / 2) :]$ 
4    $Y^l \leftarrow W_2 Y + \mathbf{b}_2 \mathbf{1}^\top$ 
5 end
6 return  $Y = [Y^0; Y^1; \dots; Y^{\ell-1}]$ 
```

---

---

**Algorithm 4: ScatteringResidualConvBlock**

---

**Input:**  $X \in \mathbb{R}^{d_d \times \ell}$   
**Output:**  $Z \in \mathbb{R}^{d_d \times \ell}$   
**Hyperparameters:**  $\ell, d$  number of stabilizers and code distance, related by  $\ell = d^2 - 1$ .  
 $L$  number of CNN layers.  $c \in \mathbb{R}^L$  output channels of CNN.

```
/* Scatter to 2D */
1 for  $coord = (0, 0), (0, 1) \dots (d, d)$  do
2   if  $\exists$  stabilizer index with coordinates  $coord$  then  $Y[coord, :] \leftarrow X[:, index]$ 
3   else  $Y[coord, :] \leftarrow P$ 
4 end
5 for  $l = 0, 1, \dots, L - 1$  do
6   /* Dilated convolutions */
7    $\tilde{Y} \leftarrow \text{layer\_norm}(Y)$ 
8    $\tilde{Y} \leftarrow \text{GELU}(\text{CNN}(\tilde{Y}; \text{kernel\_size} = 3, \text{channels} = c[l]))$ 
9   if  $c[l] \neq d_d$  then
10     $\tilde{Y} \leftarrow \text{CNN}(\tilde{X}; \text{kernel\_size} = 1, \text{channels} = d_d)$ 
11  end
12   $Y \leftarrow Y + \tilde{Y}$        $\llbracket Y \in \mathbb{R}^{(d+1)(d+1)d_d} \rrbracket$ 
13 end
/* Gather from 2D */
13 for  $coord = (0, 0), (0, 1) \dots (d, d)$  do
14   if  $\exists$  stabilizer index with coordinates  $coord$  then
15      $Z[:, index] \leftarrow Y[coord, :]$ 
16   end
17 end
18 return  $Z$ 
```

---

---

**Algorithm 5: RNNCore**

---

**Input:**  $X \in \mathbb{R}^{d_a \times \ell}$ , decoder state.  $S \in \mathbb{R}^{d_a \times \ell}$ , embedded stabilizers at current round.  
 $B \in \mathbb{R}^{d_b \ell \ell}$  embedded attention bias.

**Output:**  $X \in \mathbb{R}^{d_a \times \ell}$ , updated decoder state.

**Hyperparameters:**  $L \in \mathbb{N}$ , number of layers

- 1  $X \leftarrow (X + S)/\sqrt{2}$
- 2 **for**  $l = 0, 1, \dots, L - 1$  **do**
  - 3  $\tilde{X} \leftarrow \text{layer\_norm}(X)$
  - 4  $X \leftarrow X + \text{MHAttentionWithBias}(\tilde{X}, B)$
  - 5  $\tilde{X} \leftarrow \text{layer\_norm}(X)$
  - 6  $X \leftarrow X + \text{GatedDenseBlock}(\tilde{X})$
  - 7  $X \leftarrow \text{ScatteringResidualConvBlock}(X)$
- 8 **end**
- 9 **return**  $X$

---
